# Supplementary material
Source: Springer Nature journal article supplement (https://www.springermedizin.de/resource/supplementary/12889_2012_5125_MOESM4_ESM.pdf/9494688)

**R = 1.8**

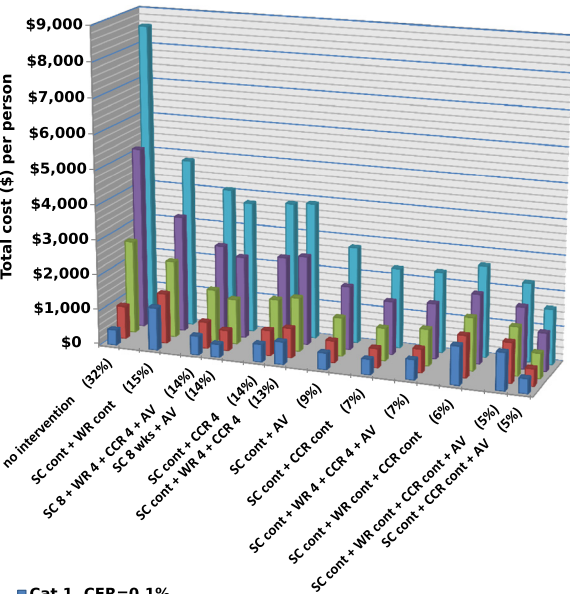

■ Cat 1, CFR=0.1%

■ Cat 3, CFR=0.75%

■ Cat 5, CFR=2.5%

■ Cat 2, CFR=0.25%

■ Cat 4, CFR=1.5%

Supplement: MOESM4 [file 9494688]
